# Supplementary material for: YAP Promotes Chemoresistance to 5-FU in Colorectal Cancer Through mTOR/GLUT3 Axis
Source: PubMed Central journal article supplement (PMC11632981; doi:10.7150/jca.100179), 2024-11-04
Supplement: jcav15p6784s1.pdf [file jcav15p6784s1.pdf]

**Supplementary Table 1** Oligonucleotides used in this study

| Definition | Sequence(5'-3')         |
|------------|-------------------------|
| sh-YAP     | GGUCAGAGAUACUUCUUAUUAAU |
| sh-NC      | UUCUCCGAACGUGUCACGUTT   |

**Supplementary Table 2** Primers used in this study

| Name   | Primer         | Sequence              |
|--------|----------------|-----------------------|
| GLUT1  | Forward primer | ACTCCTCGATCACCTTCTGG  |
|        | Reverse primer | ATGGAGCCCAGCAGCAA     |
| GLUT2  | Forward primer | ATCCAAACTGGAAGGAACCC  |
|        | Reverse primer | CATGTGCCACACTCACACAA  |
| GLUT3  | Forward primer | GATGGGCTCTTGAACACCTG  |
|        | Reverse primer | GACAGCCCATCATCATTTC   |
| GLUT4  | Forward primer | CCCCAATGTTGTACCCAAAC  |
|        | Reverse primer | CTTCCAACAGATAGGCTCCG  |
| GLUT5  | Forward primer | TGACAGCAGCCACGTTGTA   |
|        | Reverse primer | GCAACAGGATCAGAGCATGA  |
| GLUT6  | Forward primer | AACATGATGCTCAGCTTCCG  |
|        | Reverse primer | CTGACCTGCATCTGACCAAA  |
| GLUT7  | Forward primer | TGTTGTTGATCAGCAGGGTC  |
|        | Reverse primer | TGCTGCTTCTATGGTCTTGC  |
| GLUT8  | Forward primer | GAAGCACATGAGAAGCAGCA  |
|        | Reverse primer | CTGTGTGCAGCTAATGGTCCG |
| GLUT9  | Forward primer | GGTGCCTGCAATGATGAAG   |
|        | Reverse primer | GAGTATCGTGGGCATTCTGG  |
| GLUT10 | Forward primer | CAGCAAAGACACAGAGGCAC  |
|        | Reverse primer | GGAAAGTTTGTCCGGCG     |
| GLUT11 | Forward primer | AAACAGGATTGCTGCTGACA  |
|        | Reverse primer | CGTGTCTCTGTATCCCCTGG  |
| GLUT12 | Forward primer | ACGAGCCATGGCTTTAACTT  |
|        | Reverse primer | CATGGCAGGCCAATAAGAT   |
| GAPDH  | Forward primer | CAGGAGGCATTGCTGATGAT  |
|        | Reverse primer | GAAGGCTGGGGCTCATT     |

**Supplementary Table 3** Antibodies used in this study

| Antibodies | Manufacturers                              | Applications                   |
|------------|--------------------------------------------|--------------------------------|
| YAP        | CST, 14074S                                | 1:1000 for WB, 1:500 for IHC   |
| PCNA       | CST,13110S                                 | 1:1000 for WB, 1:10000 for IHC |
| Ki-67      | Abcam, ab16667                             | 1:1000 for WB, 1:200 for IHC   |
| GLUT3      | Abcam, ab314193<br>Proteintech, 20403-1-AP | 1:1000 for WB                  |

|                |                         |               |
|----------------|-------------------------|---------------|
| mTOR           | Abcam, ab134903         | 1:1000 for WB |
| p-mTOR         | Abcam, ab109268         | 1:1000 for WB |
| p-PI3K         | CST, 17366S             | 1:1000 for WB |
| p-AKT          | Abcam, ab38449          | 1:1000 for WB |
| HK2            | CST, 2867S              | 1:1000 for WB |
| ENO1           | CST, 3810S              | 1:1000 for WB |
| LDHA           | CST, 3582S              | 1:1000 for WB |
| PGAM1          | Abcam, ab288376         | 1:1000 for WB |
| $\beta$ -actin | Servicebio, GB15003-100 | 1:1000 for WB |
